# Supplementary material for: Chemical reaction controlled synthesis of Cu2O hollow octahedra and core–shell structures
Source: Royal Society of Chemistry journal article supplement (doi:10.1039/c3ce41745j), 2013-01-01
Supplement: c3ce41745j.pdf [file c3ce41745j.pdf]

## Supporting information

# Chemical reaction controlled synthesis of $\text{Cu}_2\text{O}$ hollow octahedra and core-shell structures

Kunfeng Chen, Shuyan Song and Dongfeng Xue\*

State Key Laboratory of Rare Earth Resource Utilization, Changchun Institute of Applied Chemistry, Chinese Academy of Sciences, Changchun 130022, China

\* Corresponding author. E-mail: [dongfeng@ciac.ac.cn](mailto:dongfeng@ciac.ac.cn)

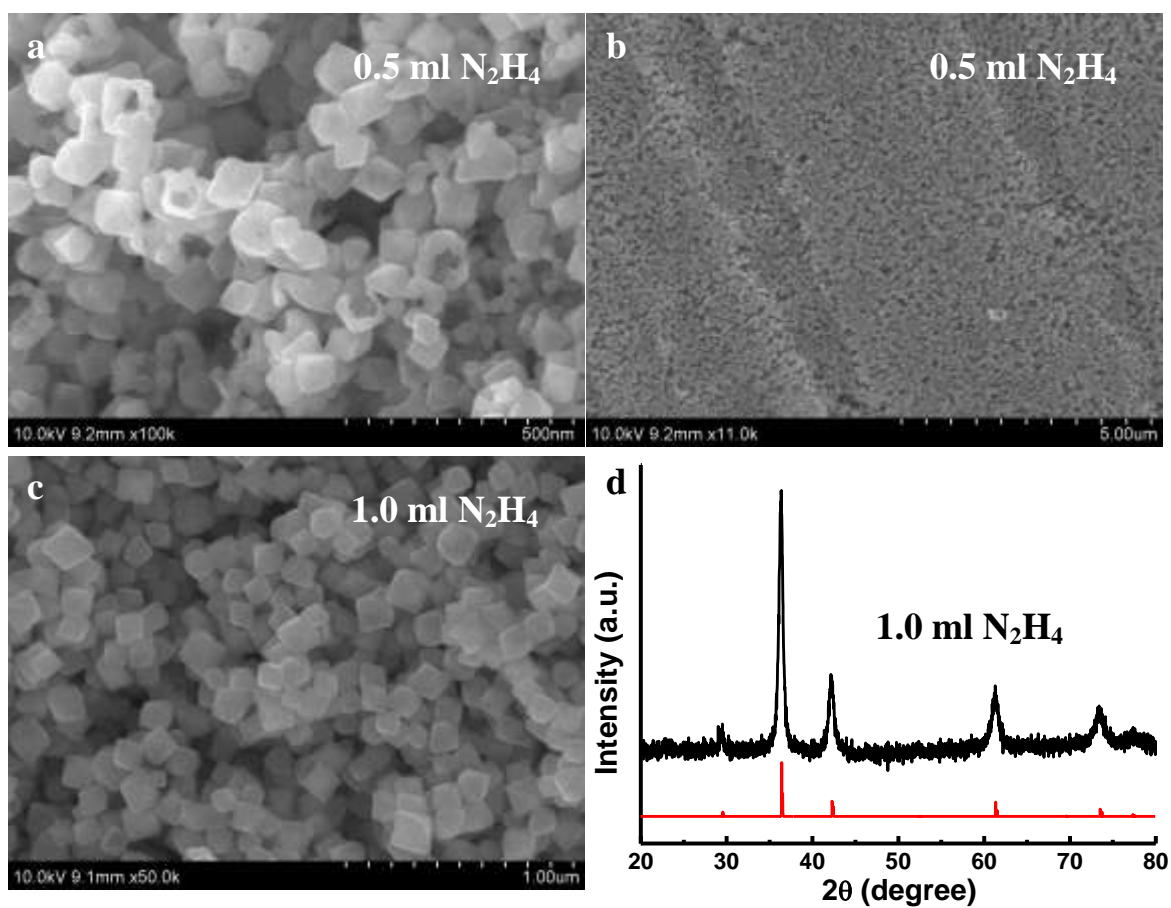

Fig. S1 SEM images (a-c) and XRD patterns (d) of final products with adding different amounts of  $N_2H_4$ .

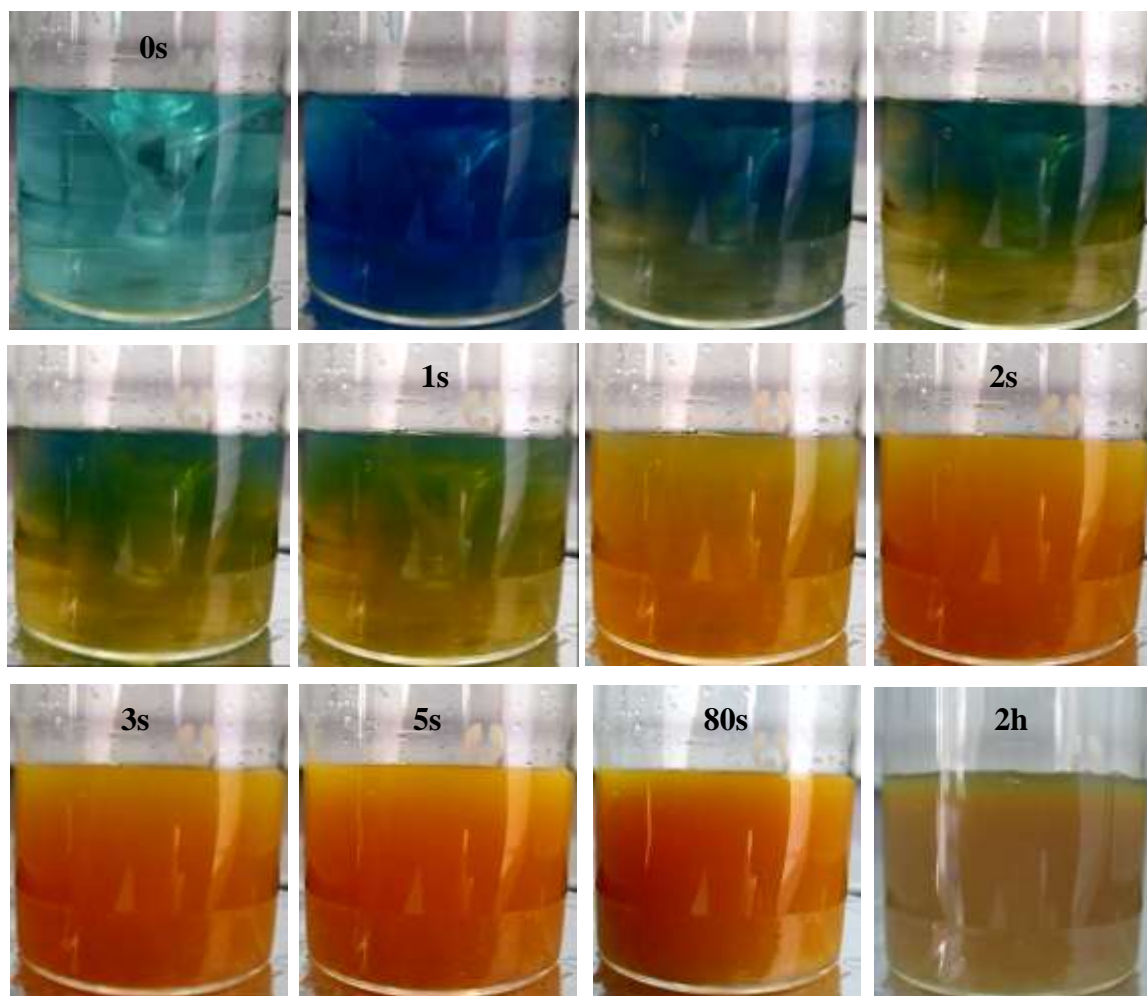

Fig. S2 Photo images show the change of reaction solution after adding 0.5ml  $N_2H_4$  to  $CuAc_2$  solution. The reaction was fast, where the solution colors were changed from light blue to dark blue, to yellow green with the reaction time less than 1s. Orange solutions were obtained when the reaction time was less than 2s. After 2h, the reaction solution turned to yellow color.

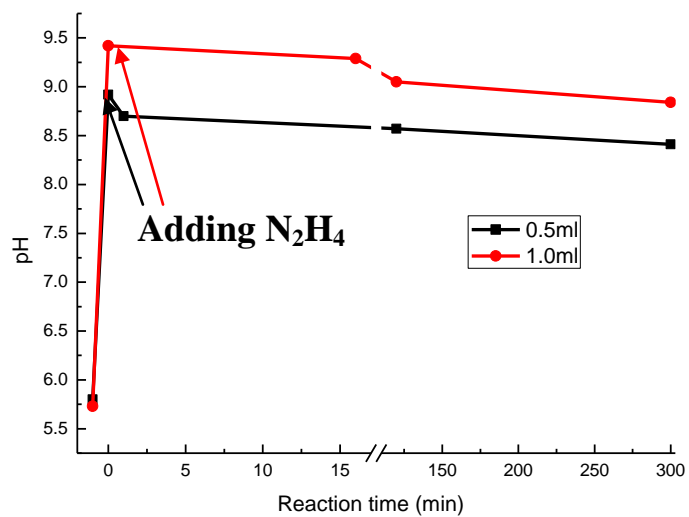

Fig. S3 pH change upon reaction times with adding different concentrations of N<sub>2</sub>H<sub>4</sub>.

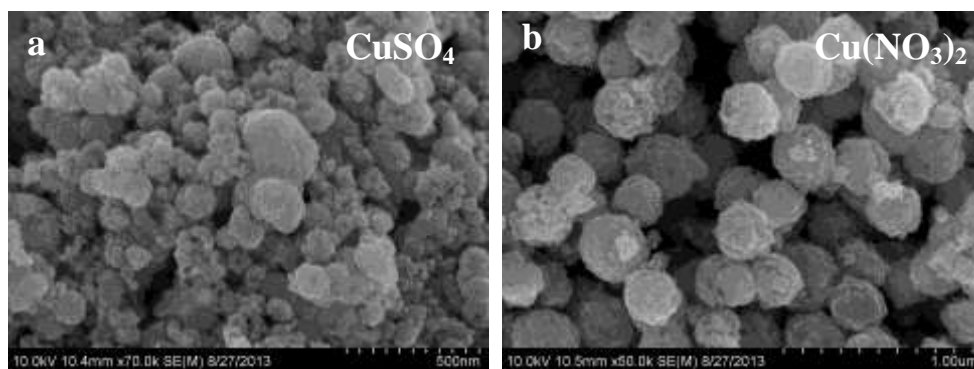

Fig. S4 SEM images of products obtained with using CuSO<sub>4</sub> (a) and Cu(NO<sub>3</sub>)<sub>2</sub> (b) as starting copper salts. Both of them are nanoparticles aggregated spheres.

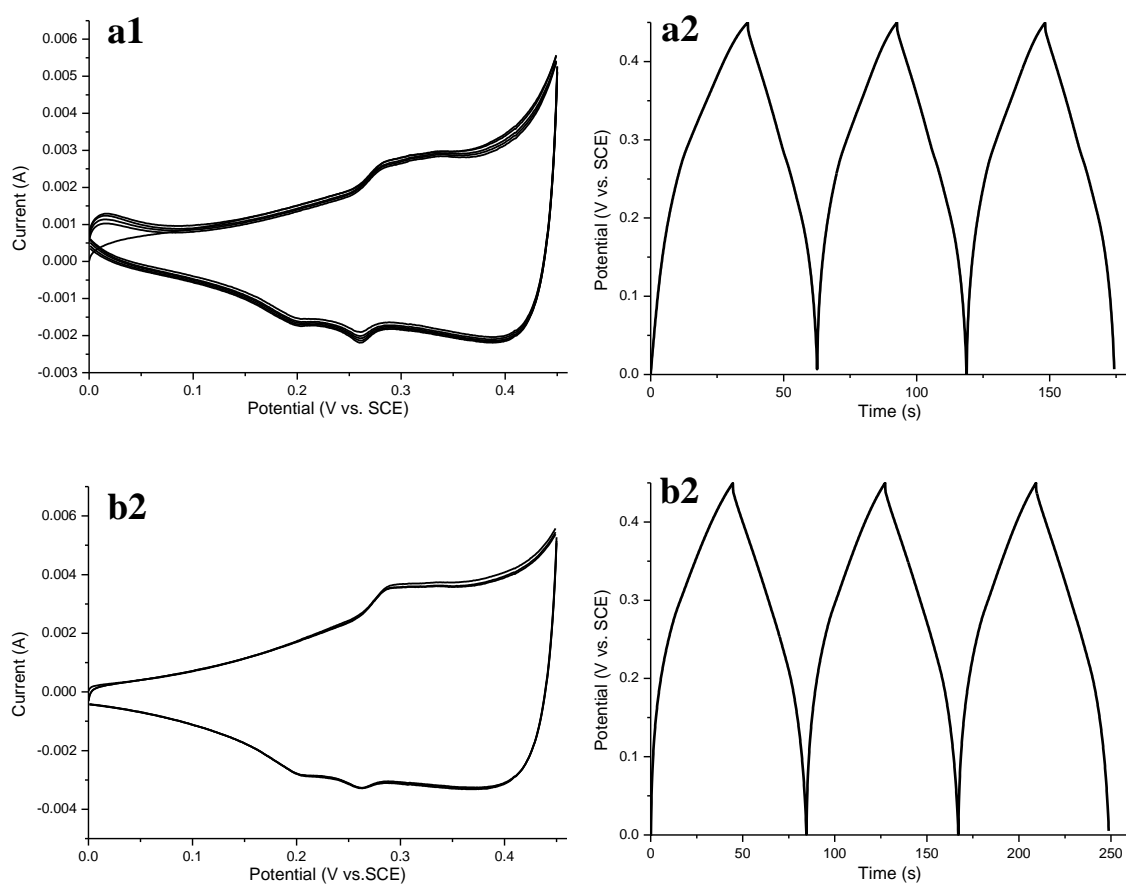

Fig. S5 Electrochemical properties of Cu<sub>2</sub>O hollow octahedra (a) and core@shell structures (b) for supercapacitor in 2M KOH. (a1,b1) CV curves at scan rates of 10mV/s and (a2, b2) galvanostatic charge/discharge curves at current density of 1A/g of Cu<sub>2</sub>O electrodes.

Table S1. Specific capacitances of Cu<sub>2</sub>O hollow octahedra and core@shell structures  
as supercapacitor electrodes

| Material                                | Specific capacitance (F g <sup>-1</sup> ) with<br>$\Delta V=0.45V$ , and current density of 1A/g |
|-----------------------------------------|--------------------------------------------------------------------------------------------------|
| Cu <sub>2</sub> O hollow octahedra      | 58                                                                                               |
| Cu <sub>2</sub> O core@shell structures | 88                                                                                               |
